# Supplementary material for: Molecular doping of CuSCN for hole transporting layers in inverted-type planar perovskite solar cells
Source: Royal Society of Chemistry journal article supplement (doi:10.1039/c9qi00557a), 2019-01-01
Supplement: c9qi00557a1.pdf [file c9qi00557a1.pdf]

*Supplementary data for*

## **Molecular doping of CuSCN for hole transporting layer in inverted-type planar perovskite solar cells**

*In Su Jin,<sup>§</sup> Ju Ho Lee,<sup>§</sup> Young Wook Noh,<sup>§</sup> Sang Hyun Park<sup>§</sup> and Jae Woong Jung<sup>§\*</sup>*

<sup>§</sup>Department of Advanced Materials Engineering for Information & Electronics, Kyung Hee University, 1732 Deogyong-daero, Giheung-gu, Yongin-si, Gyeonggi-do 446-701, Republic of Korea

\* Corresponding author.

Email addresses: wodndwjd@khu.ac.kr

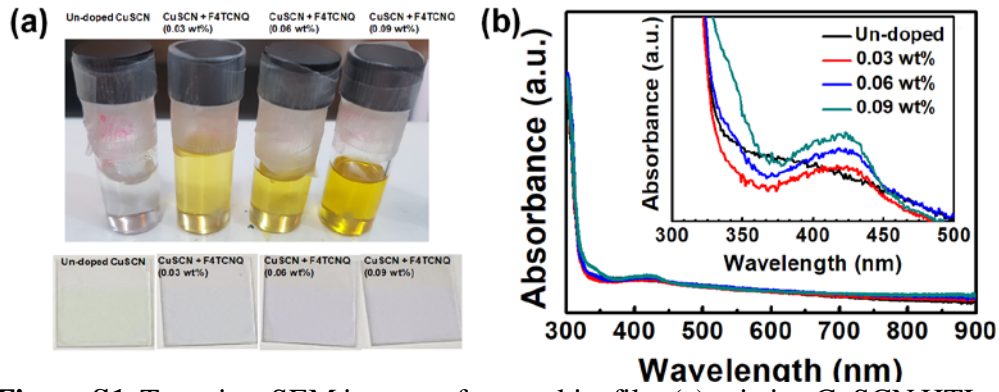

**Figure S1.** Top-view SEM images of perovskite film (a) pristine CuSCN HTL and (b) 0.03 wt% F4TCNQ-doped CuSCN.

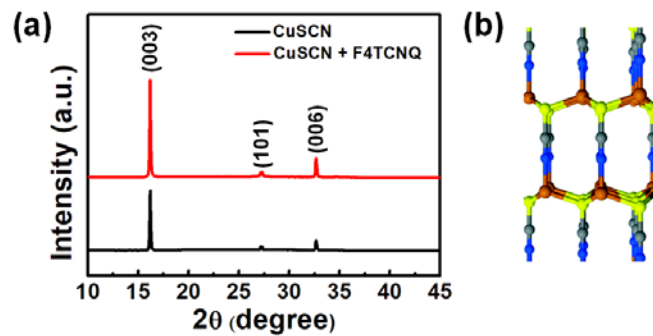

**Figure S2.** X-ray diffraction patterns of CuSCN with and without F4TCNQ (a) and corresponding schematic illustration of CuSCN in  $\beta$ -phase (brown sphere = Cu; yellow sphere = S; gray sphere = C; and blue sphere = N) (b).

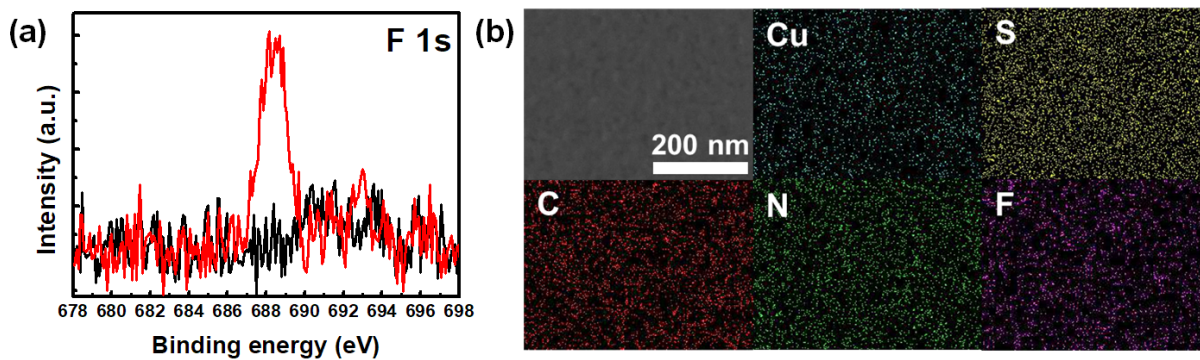

**Figure S3.** XPS core-level signal for F1s (a), and elemental mapping of F4TCNQ (0.03 wt%)-doped CuSCN thin films by SEM (EDS) (b).

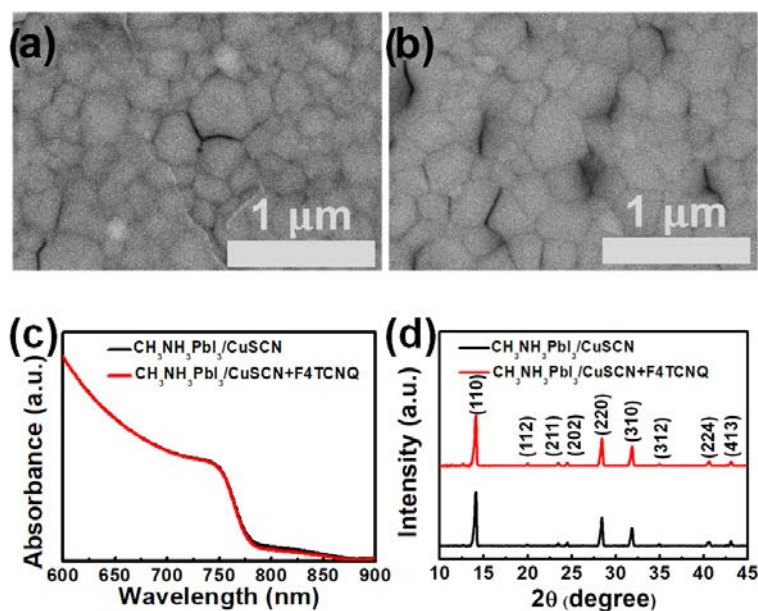

**Figure S4.** SEM images for  $\text{CH}_3\text{NH}_3\text{PbI}_3$  layers on CuSCN (a) and on CuSCN with F4TCNQ (b), and their absorption spectra (c) and X-ray diffractograms (d).

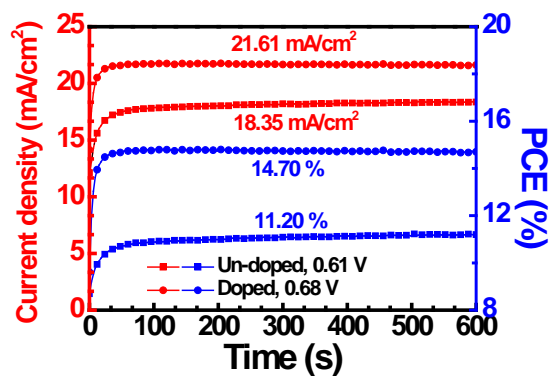

**Figure S5.** Steady-state photocurrent generations under  $100 \text{ mW/cm}^2$  illumination at each maximum power point voltage for the devices employing the un-doped and the doped CuSCN.

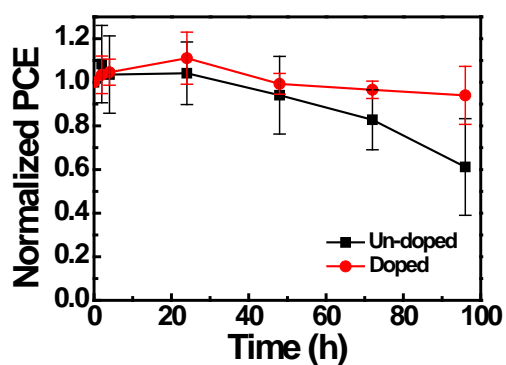

**Figure S6.** Normalized PCE of devices with un-doped and doped CuSCN when stored in a glovebox.
